# Supplementary material for: DORA-XGB: an improved enzymatic reaction feasibility classifier trained using a novel synthetic data approach
Source: Royal Society of Chemistry journal article supplement (doi:10.1039/d4me00118d), 2024-11-02
Supplement: d4me00118d2.pdf [file d4me00118d2.pdf]

1  
2  
3  
4  
5  
6  
7  
8  
9  
10  
11  
12  
13  
14  
15  
16  
17  
18  
19  
20  
21  
22  
23  
24  
25  
26  
27  
28  
29  
30  
31  
32  
33  
34  
35  
36  
37  
38  
39  
40

**Supporting information for:**  
**DORA-XGB: An improved enzymatic reaction feasibility  
classifier trained using a novel synthetic data approach**

Yash Chainani<sup>†1,2</sup>, Zhuofu Ni<sup>†1,2</sup>, Kevin M. Shebek<sup>1,2</sup>, Linda J. Broadbelt<sup>1,2</sup>, and  
Keith E.J. Tyo<sup>1,2</sup>,

<sup>†</sup> The authors contributed equally to this work

<sup>1</sup>Department of Chemical and Biological Engineering, Northwestern University,  
Evanston, IL, USA

<sup>2</sup>Center for Synthetic Biology, Northwestern University, Evanston, IL, USA

Manuscript in preparation for:  
Royal Society of Chemistry Molecular Systems Design and Engineering

## 41 1. GENERAL PIPELINE

### 42 1.1 Overall workflow for building DORA-XGB.

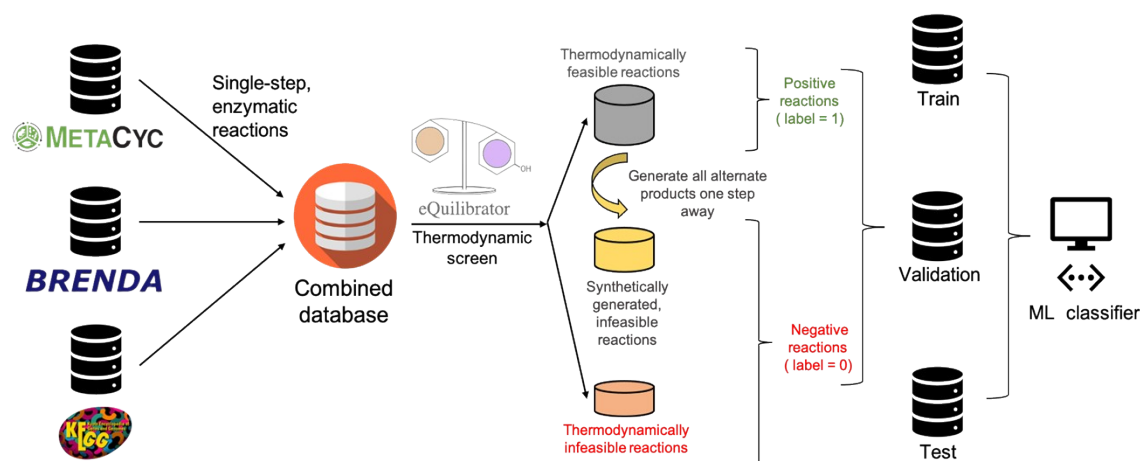

SI Fig. 1 Overall workflow for developing DORA-XGB

43 In order to develop our DORA-XGB models, reported reactions from BRENDA, KEGG, and  
44 MetaCyc were curated in both directions. A thermodynamic screen was then performed to divide  
45 curated reactions into a thermodynamically feasible and infeasible set. From the  
46 thermodynamically feasible set of reactions, all products one step away that could hypothetically  
47 have been observed under the same biochemical transformation but were never actually observed  
48 are generated (our “alternate reaction center” assumption). These synthetically generated infeasible  
49 reactions are then combined with the thermodynamically infeasible known reactions found earlier  
50 to create a training dataset with both positive and negative reaction data. Stratified  
51 train/validation/test splits in an 80/10/10 ratio were then performed to divide positive and negative  
52 reaction data into sets for model training, validation, and testing respectively. All model  
53 hyperparameters were tuned with a Bayesian hyperparameter optimization procedure as opposed  
54 to an exhaustive grid-search or a random-search.

55

## 56 **2. DEPLOYMENT AND USAGE**

### 57 **2.1 Using DORA-XGB for the prediction of enzymatic reaction feasibility.**

58 Users can try our consolidated DORA-XGB classifier by providing an enzymatic reaction  
59 string as an input to the classifier. The input reaction should be balanced. For a reaction of the form  
60 “A + cofactor → B + cofactor”, the input string can be written as: “A SMILES + cofactor SMILES =  
61 B SMILES + cofactor SMILES” or as “A.cofactor>>B.cofactor”. The output from DORA-XGB is  
62 a feasibility score. The optimum threshold at which an input reaction can be labelled as feasible on  
63 the basis of its predicted score has been provided and was determined through analysis of precision,  
64 recall, and F1 scores of all models against the test set at 100 linearly spaced thresholds between 0  
65 and 1. The threshold at which a model’s F1 score on its corresponding test set is maximized is then  
66 reported as its optimum threshold. Users may also choose their own threshold, allowing them to  
67 filter fewer or more compounds and reactions in a network expansion based on the threshold used.  
68

## 69 **3. PREPROCESSING OF DATA**

### 70 **3.1 Complete list of cofactor concentration ratios used in this study.**

71 The following ratios of cofactor concentrations are used in this study when using eQuilibrator  
72 to determine the minimum  $\Delta_r G'$  value,  $\Delta_r G'_{min}$  that can be released from a given reaction wherein  
73 metabolite concentration is allowed to vary from 0.1 mM to 100 mM. In this work, we considered  
74 NADH/NAD and NADPH/NADP as distinct cofactor pairs since they are bound by different  
75 concentration ratios.

76  $[ATP]/ [ADP] = 10$

77  $[ADP]/ [AMP] = 1$

78  $[NADH]/ [NAD^+] = 0.1$

79  $[NADPH]/ [NADP^+] = 10$

80

81

82

83 **3.2 Distribution of  $\Delta_r G'_{min}$  values for six select classes of enzymatic reactions.**

84 Here, we present the distribution of  $\Delta_r G'_{min}$  values for six select classes of enzymatic  
85 reactions. These six classes are: (1) monooxygenases (EC 1.14.13.x) (SI Fig. 2), (2) alcohol  
86 dehydrogenases (EC 1.1.1.x) (SI Fig. 3), (3) decarboxylases (EC 4.1.1.x) (SI Fig. 4), (4) aldehyde  
87 dehydrogenases (EC 1.2.1.x) (SI Fig. 5), (5) phosphoryltransferases (EC 2.7.1.x) (SI Fig. 6), and  
88 (6) glucosyltransferases (EC 2.4.1.x) (SI Fig. 7). In each plot,  $\Delta_r G'_{min}$  values are shown for both  
89 directions of the generalized transformation. For example, within the monooxygenase class of  
90 enzymes (EC 1.14.13.x),  $\Delta_r G'_{min}$  values are far more downhill (i.e., more negative) in the  
91 monooxygenation direction wherein an oxygen is added to the substrate than in the reduction  
92 direction wherein an oxygen is removed from the substrate (SI Fig. 2).

93

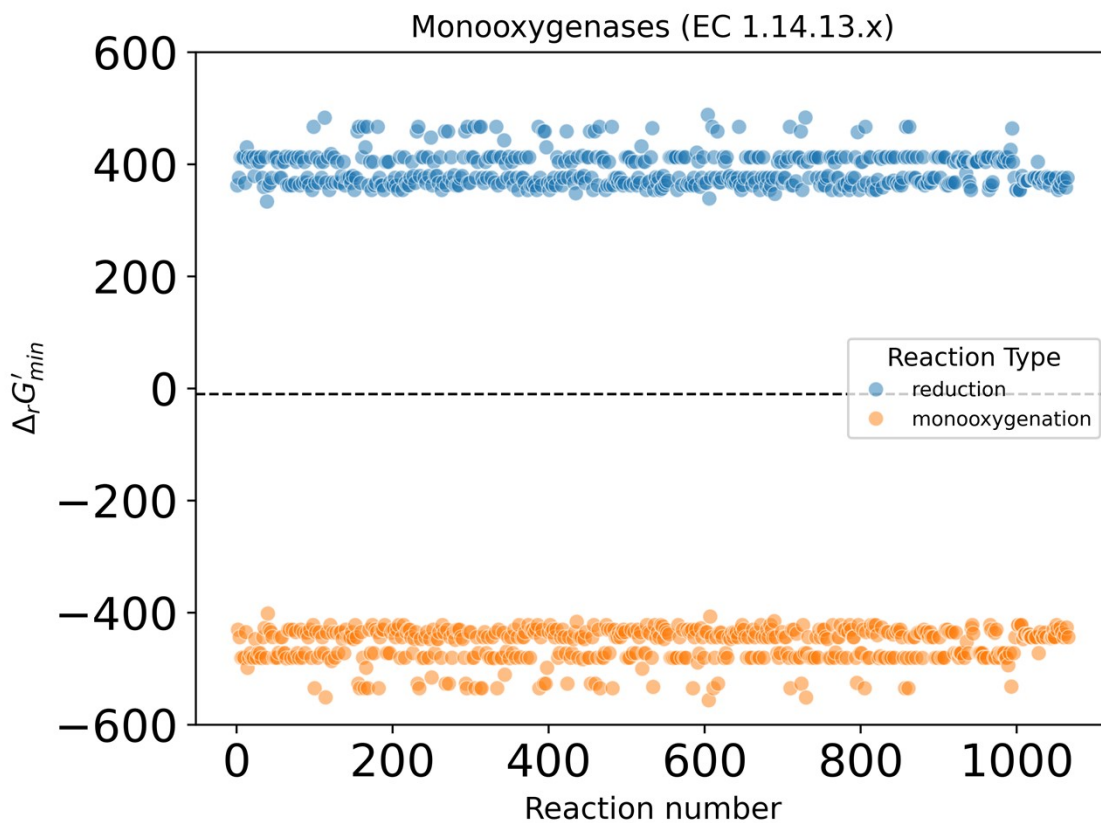

SI Fig. 2 Distribution of  $\Delta_r G'_{min}$  values in both directions for monooxygenases (EC 1.14.13.x). The dashed line represents our thermodynamic feasibility threshold of -10 kJ/mol.

94

95

96

97

98

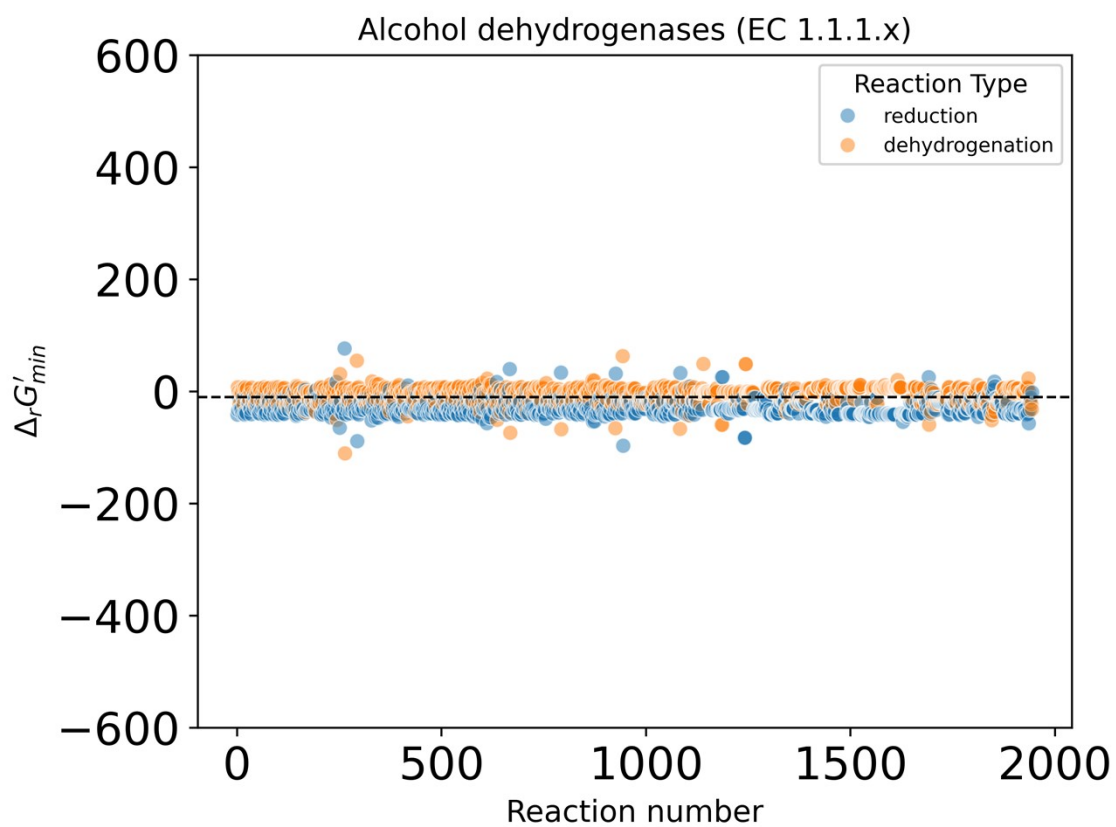

**SI Fig. 3** Distribution of  $\Delta_r G'_{min}$  values in both directions for alcohol dehydrogenases (EC 1.1.1.x). The dashed line represents our thermodynamic feasibility threshold of -10 kJ/mol.

99

100

101

102

103

104

105

106

107

108

109

110

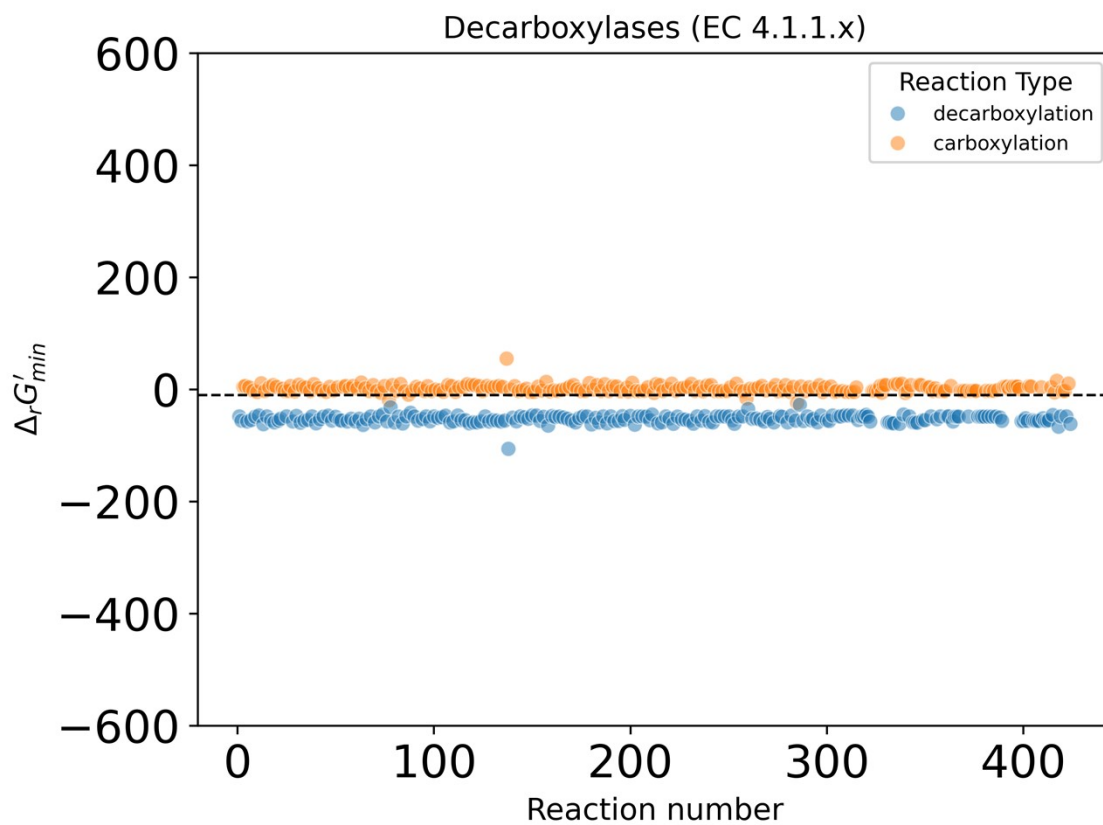

**SI Fig. 4.** Distribution of  $\Delta_r G'_{min}$  values in both directions for decarboxylases (EC 4.1.1.x). The dashed line represents our thermodynamic feasibility threshold of -10 kJ/mol.

111

112

113

114

115

116

117

118

119

120

121

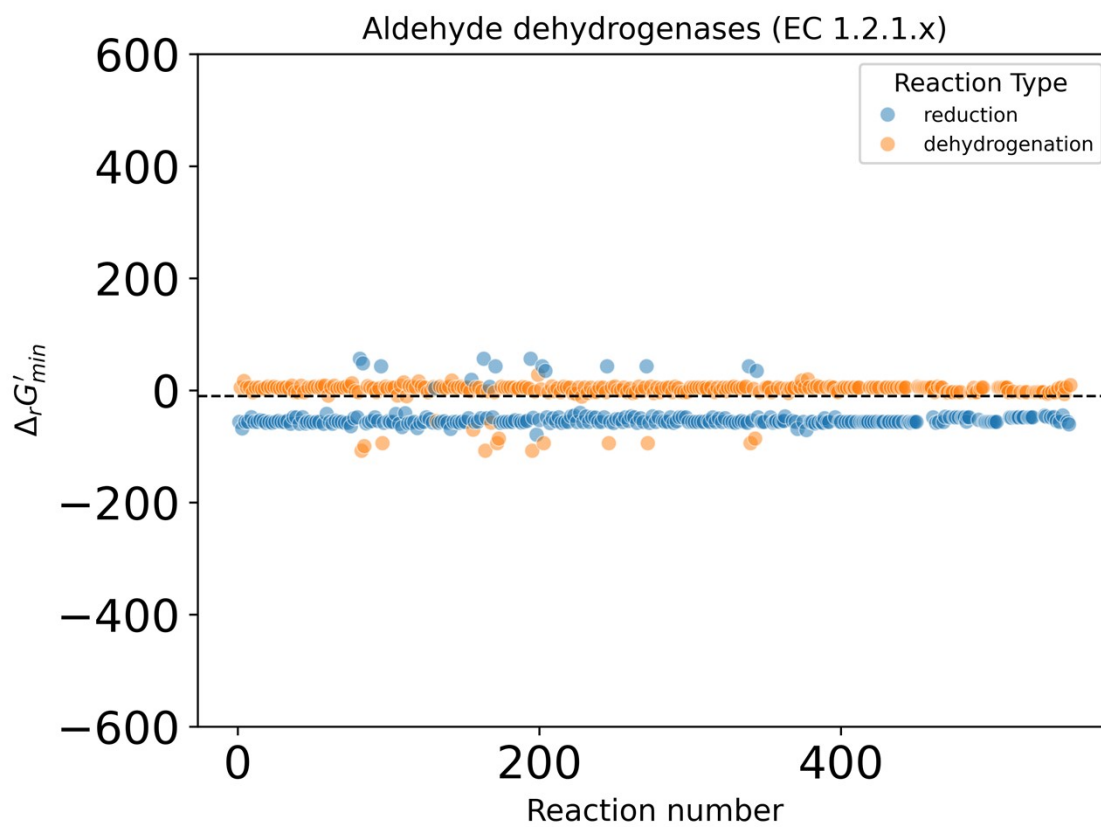

**SI Fig. 5** Distribution of  $\Delta_r G'_{min}$  values in both directions for aldehyde dehydrogenases (EC 1.2.1.x). The dashed line represents our thermodynamic feasibility threshold of -10 kJ/mol.

122

123

124

125

126

127

128

129

130

131

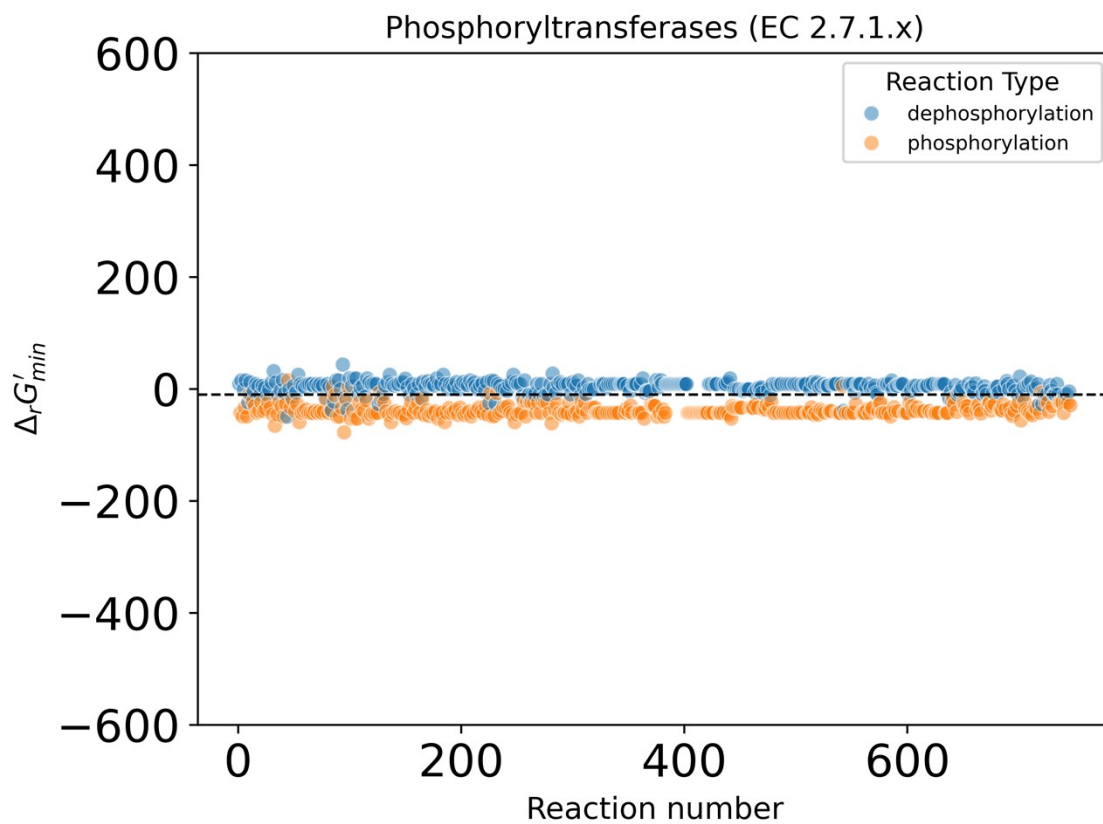

**SI Fig. 6** Distribution of  $\Delta_r G'_{min}$  values in both directions for phosphoryltransferases (EC 2.7.1.x). The dashed line represents our thermodynamic feasibility threshold of -10 kJ/mol.

- 132
- 133
- 134
- 135
- 136
- 137
- 138
- 139
- 140
- 141
- 142
- 143



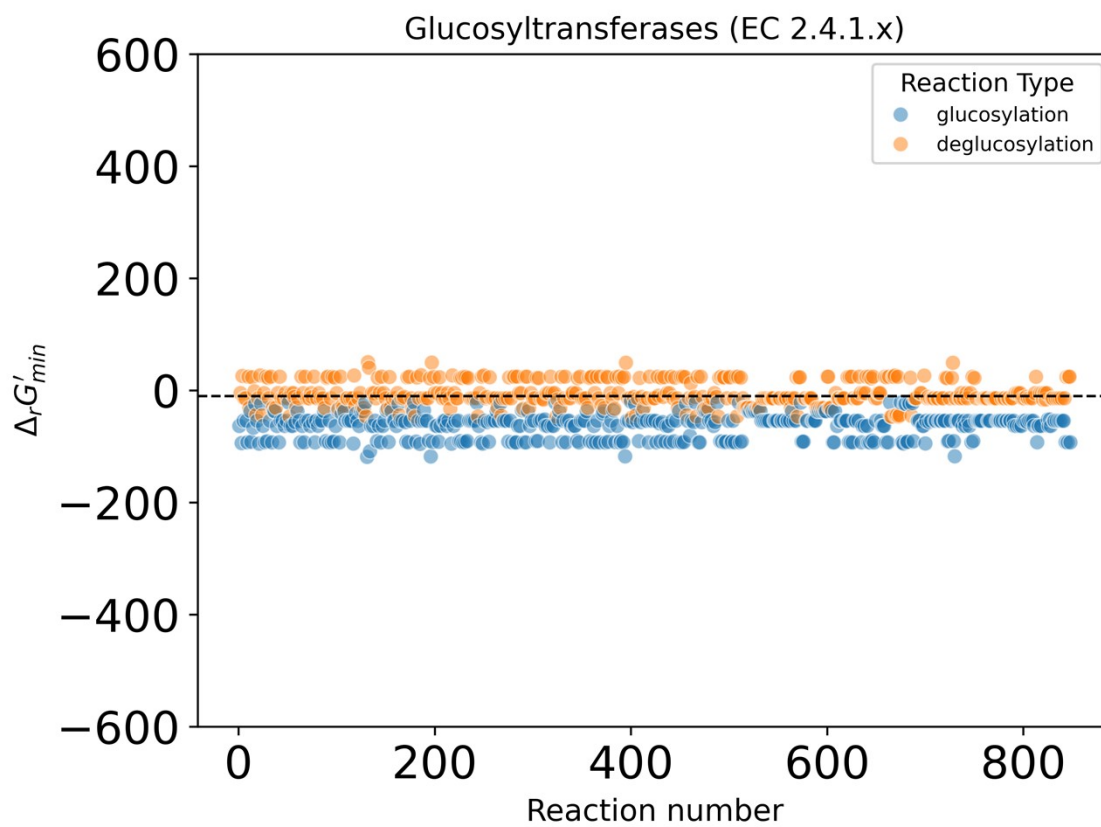

SI Fig. 7 Distribution of  $\Delta_r G'_{min}$  values in both directions for glucosyltransferases (EC 2.4.1.x)

145

146

147

148

149

150

151

152

153

154

155

156

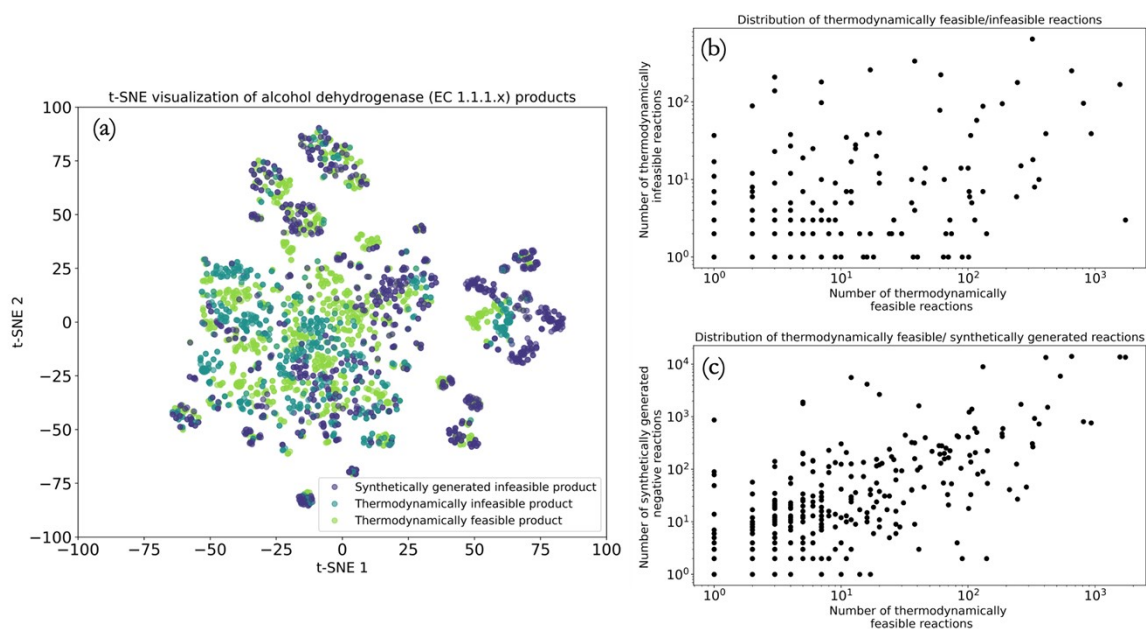

**SI Fig. 8** (a) t-stochastic neighbors' estimation (t-SNE) of thermodynamically feasible, thermodynamically infeasible, and synthetically generated negative products that fall under the alcohol dehydrogenase transformation; (b) number of all thermodynamically infeasible reactions versus thermodynamically feasible reactions; (c) number of all synthetically generated negative reactions versus thermodynamically feasible reactions.

### 158 3.3 Statistics for feasible and infeasible reactions in the training dataset.

159

160

161

162

163

164

165

166

167

168

169

170

171

## 172 4. EVALUATING MODEL PERFORMANCE

### 173 4.1 Prototyping architecture – fingerprint combinations on training an alcohol 174 dehydrogenase reaction feasibility classifier.

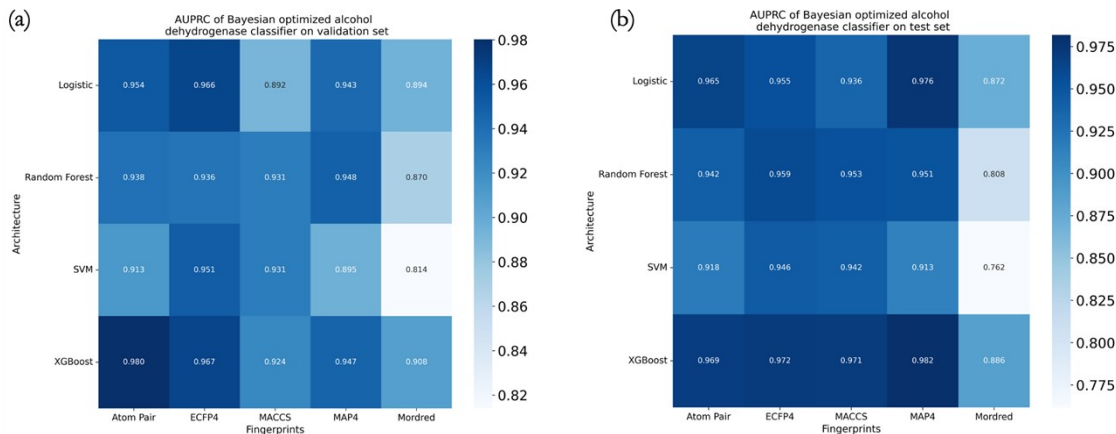

**SI Fig. 9 (a)** The average area under the precision-recall curve (AUPRC) of alcohol dehydrogenase classifiers deployed on a validation set and **(b)** test set of alcohol dehydrogenase reactions. With 1254 feasible and 1759 infeasible alcohol dehydrogenase reactions in total, a stratified train/validation/test split in an 80/10/10 ratio was performed to extract training, validation and test sets. All model hyperparameters were optimized on the validation set using a Bayesian hyperparameter approach. Reaction fingerprints are created by arranging molecular fingerprints in the order [substrate, NAD, product, NADH] for alcohol dehydrogenase reactions in the oxidation direction and [substrate, NADH, product, NAD] for alcohol dehydrogenase reactions in the reduction direction.

### 175 4.2 Exploring various arrangements of molecular fingerprints along reaction feature vectors

176 In this study, we explore different methods to arrange molecular fingerprints of species along  
177 reaction feature vectors. The simplest of these configurations involves simply concatenating  
178 molecular fingerprints of substrates, cofactors on the reactants' side, products, and cofactors on the  
179 products' side in ascending as well as descending molecular weights within each category. Since  
180 different reactions involve different numbers of species, each reaction vector is padded with zeros  
181 to 16,384 bits, which is the total number of elements present within the reaction vector representing  
182 the longest reaction within our curated database (SI Fig. 10(a) and 10(b)). In addition to  
183 concatenating all fingerprints together, we also explored performing simple operations onto  
184 molecular fingerprints to represent enzymatic reactions. In one of these configurations, "add then  
185 concatenate", the element-wise sum of all reactant fingerprints is taken and concatenated with that  
186 of product fingerprints (SI Fig. 10(c)). In another configuration, "add then subtract", the element  
187 wise of reactant fingerprints is subtracted from that of product fingerprints (SI Fig. 10(d)). In both  
188 of these configurations, paddings were not required.

189 Two additional fingerprinting configurations were also implemented to serve as negative  
190 controls (SI Fig. 10(e) and (f)). These controls seek to determine if arranging molecular fingerprints

191 in a standardized manner – as opposed to doing so randomly – truly optimizes model performance.  
 192 In the first of these negative controls, the positions of reactant fingerprints are randomized along  
 193 the first four ‘slots’ of a reaction’s feature vector. This randomization is then repeated for product  
 194 fingerprints, along the next four slots of the reaction feature vector to give a “partially randomized”  
 195 feature vector (SI Fig. 10(e)). In the final negative control, the positions of all fingerprints are  
 196 completely randomized throughout the reaction feature vector. For both of these negative controls,  
 197 if model performance were to degrade, this decline would then confirm that there does, in fact, exist  
 198 some dependency and value to the order in which molecular fingerprints are arranged to create  
 199 reaction feature vectors.

200 Another form of negative control was then implemented in which we randomly scrambled  
 201 assigned feasibility labels within our training data only. Models were then trained on this  
 202 augmented dataset to determine if they would perform well against a test dataset within which the  
 203 labels had not been altered. This would again confirm if our classifiers are performing well by  
 204 chance or if they are truly learning to capture subtle differences within the training data. These  
 205 negative controls are crucial for imbalanced datasets such as ours. Through such rigorous controls,

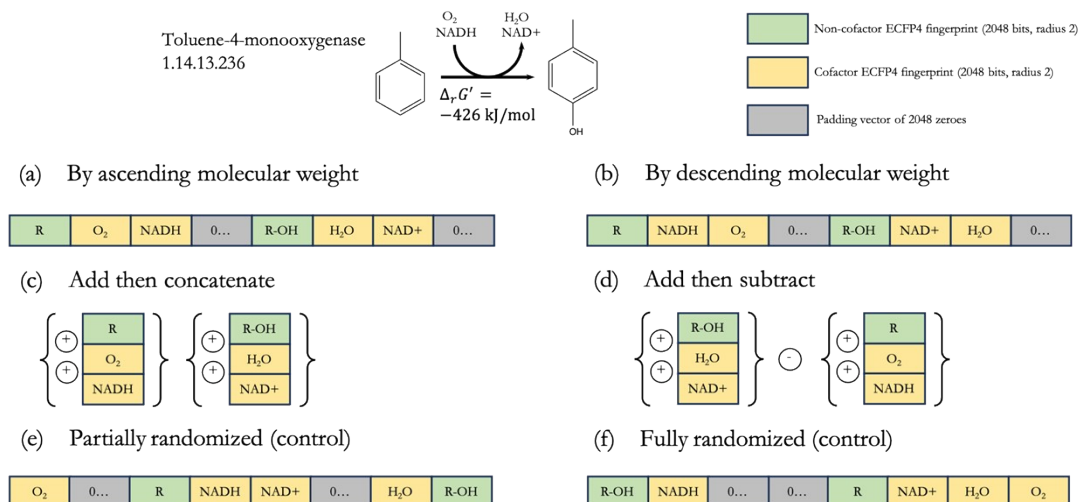

**SI Fig. 10** Six different configurations for arranging molecular fingerprints along a reaction feature vector are explored in this study and depicted here through the example of the monooxygenation of toluene catalyzed by the enzyme toluene-4-monoxygenase (EC 1.14.13.236). In configurations (a) and (b), primary reactant, primary product, and cofactor fingerprints are arranged in terms of ascending and descending molecular weights within categories. In configuration (c), the fingerprints of all reactant structures are added in an element-wise fashion and concatenated with the element-wise sum of product fingerprints. In configuration (d), the element-wise sum of product fingerprints is subtracted from that of reaction fingerprints. Configurations (e) and (f) serve as negative controls to confirm that there is indeed value to the order in which molecular fingerprints are arranged along a feature vector and that models are not just performing well by random chance.

206 we validate that the performance of our models is not merely by chance.

207

### 208 4.3 Additional negative control experiments

209 We implemented another negative control experiment to rigorously confirm the optimal  
210 performance of our feasibility classifier models. Here, assigned feasibility labels (as determined by  
211 thermodynamics and the synthetic generation of negative data) on reactions within our consolidated  
212 training set were randomly scrambled (SI Fig. 11 (a) and (b)). Models were then trained on this  
213 augmented dataset to determine if they would perform well against a test dataset within which  
214 feasibility labels had not been altered. This would again confirm if DORA-XGB was performing  
215 well solely by chance or if it were truly learning to capture subtle differences within reaction data.  
216 Such controls are crucial for imbalanced datasets such as ours because any model that simply  
217 predicts negative labels by default would be accurate 7/8 times anyway. Thus, these controls can  
218 ascertain that models are not being overfit to training data and not merely predicting reactions as

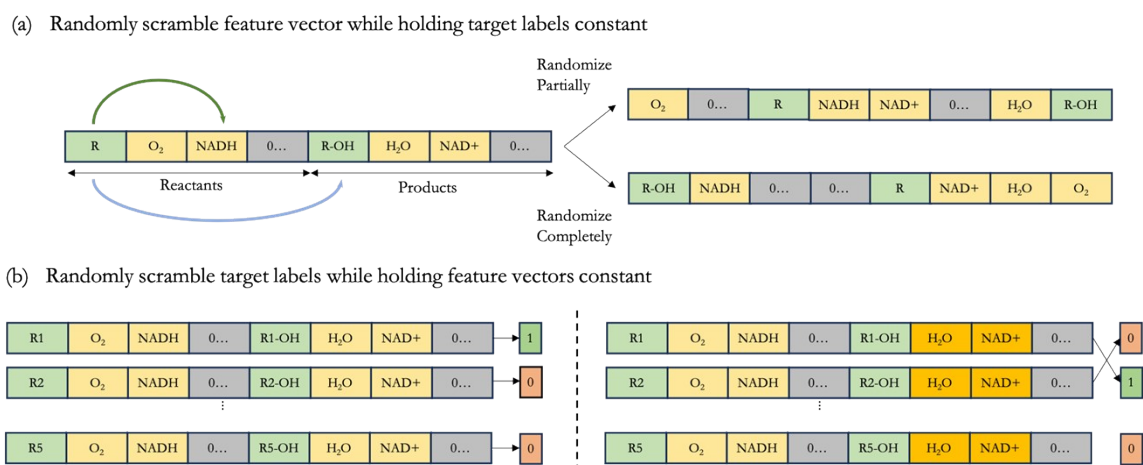

**SI Fig. 11** In order to confirm that the performance of trained feasibility classification models is not merely by chance, we performed two types of negative control experiments where we expected model performance to decline: **(a)** in the first type of negative control, molecular fingerprints arranged along a reaction's feature vector are randomly scrambled within only the 'slots' allocated to reactants and products (partially randomized) as well as throughout the entire feature vector (fully randomized); **(b)** in the second type of control experiment, the configuration in which reaction feature vectors are constructed is held constant while the target feasibility labels within the training set are mutated. Feasibility models are then trained on these augmented labels to confirm that they will perform poorly on a test dataset in which assigned labels have not been mutated.

219 infeasible by default.

220

221

222

223

#### 224 4.4 Comparing the performance of individual vs. consolidated classifiers

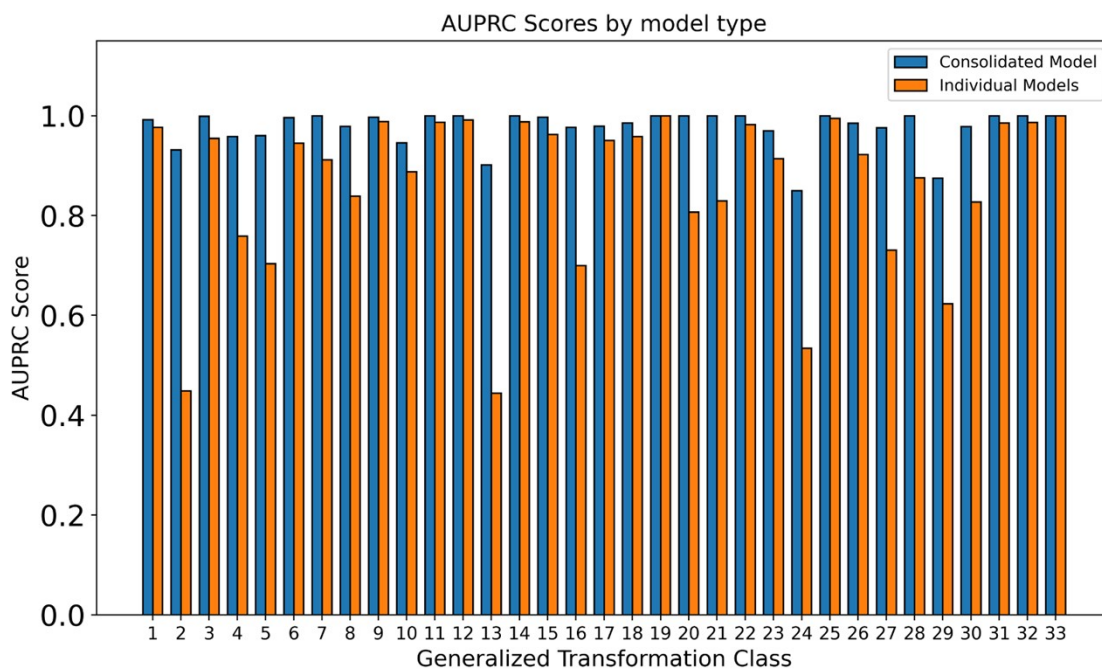

**SI Fig. 12** In order to determine if it would be more effective to train multiple individual feasibility classifiers specific to each class or to train a single, consolidated feasibility classifier for all enzymatic reaction classes, we computed the average area under the precision-recall curve (AUPRC) between individual classifiers trained on 33 classes of enzymatic reactions and our consolidated classifier. The average AUPRC from individual classifiers was found to be lower than that of the consolidated classifier. The top 33 classes of generalized transformations make up for 64.3% of the reactions in our dataset.

225

226

227

228

229 **4.5 Performance of consolidated classifiers trained with various cofactor configurations**  
 230 **against the test set.**  
 231

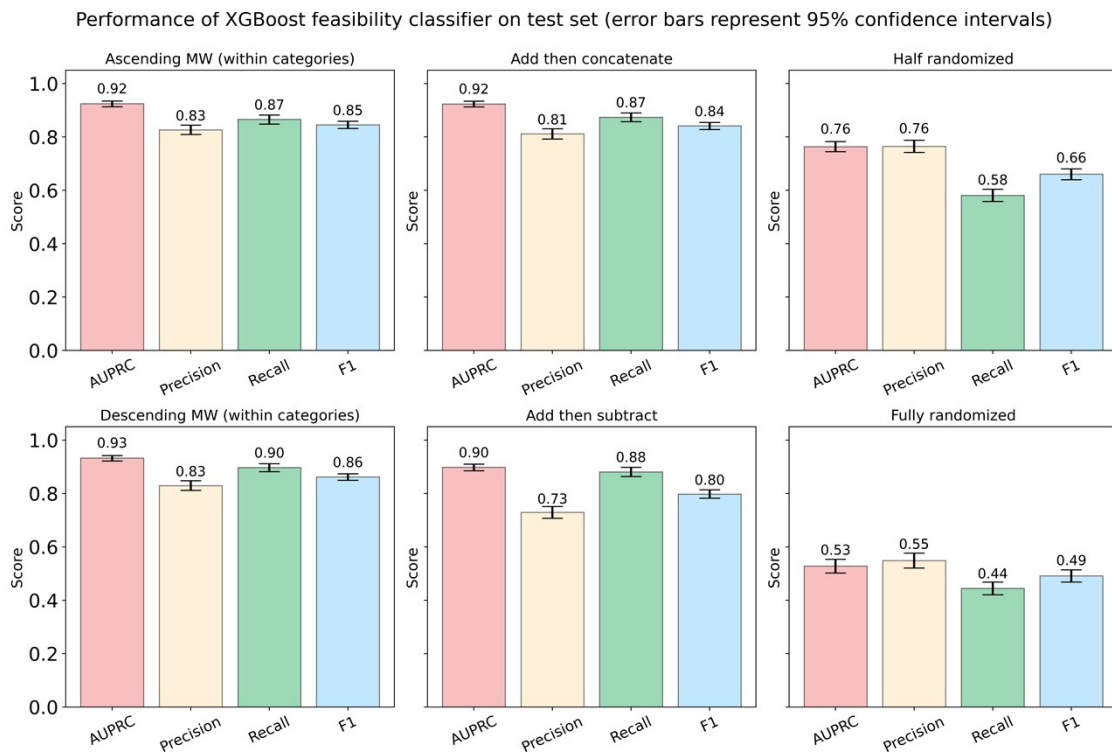

SI Fig. 13 The average area under the precision-recall curve (AUPRC), precision, recall, and F1 scores of six consolidated feasibility classifiers trained on all enzymatic reactions with various feature vector configurations.

232  
 233  
 234  
 235  
 236  
 237  
 238  
 239  
 240  
 241  
 242  
 243  
 244  
 245  
 246  
 247  
 248  
 249  
 250  
 251

252 **4.6 Comparing the performance of our alternate reaction center assumption model with the**  
253 **unreported is negative assumption model.**



**SI Fig. 14** Our reaction feasibility classifier trained on the “alternate reaction center” assumption receives a higher AUPRC score than DeepRFC, another deep-learning based classifier trained with negative data generated under the “unreported is negative” assumption. Our in-house “unreported is negative” assumption dataset led to a sharp decline in model performance in contrast to our model trained under the “alternate reaction center” assumption.

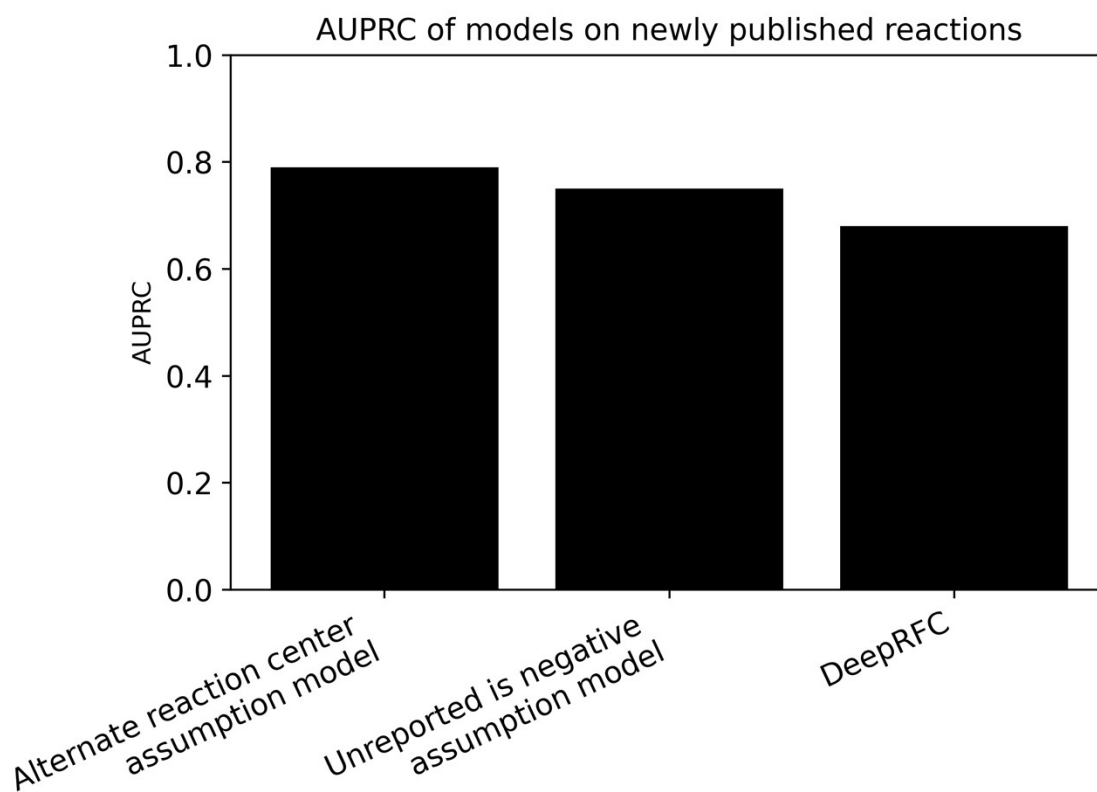

255

256

257

258

259

260

261

262

263

264

265 **4.7 Performance on newly discovered *Escherichia coli* reactions.**

| <b>A</b>  |          | Actual   |          |
|-----------|----------|----------|----------|
|           |          | Positive | Negative |
| Predicted | Positive | 28       | 0        |
|           | Negative | 2        | 0        |

| <b>B</b>  |          | Actual   |          |
|-----------|----------|----------|----------|
|           |          | Positive | Negative |
| Predicted | Positive | 25       | 0        |
|           | Negative | 15       | 0        |

| <b>C</b>  |          | Actual   |          |
|-----------|----------|----------|----------|
|           |          | Positive | Negative |
| Predicted | Positive | 0        | 1581     |
|           | Negative | 0        | 2955     |

| <b>D</b>  |          | Actual   |          |
|-----------|----------|----------|----------|
|           |          | Positive | Negative |
| Predicted | Positive | 0        | 4526     |
|           | Negative | 0        | 12827    |

266

267 SI Table 1. **(a)** DORA-XGB's recovery of novel, experimentally validated reactions (30 total)  
268 obtained from an *e. coli* nontargeted metabolomics dataset; **(b)** recovery of predicted, plausibly  
269 positive and novel *e. coli* reactions (40 total) obtained from the same dataset; **(c)** prediction of 4536  
270 total plausibly negative reactions that were synthetically generated from the 30 experimentally  
271 validated positive *e. coli* reactions; **(d)** prediction of 17353 plausibly negative reactions that were  
272 synthetically generated from the 40 plausibly positive *e. coli* reactions.

273

274

#### 275 4.8 Filtering out infeasible compounds and reactions in a network expansion

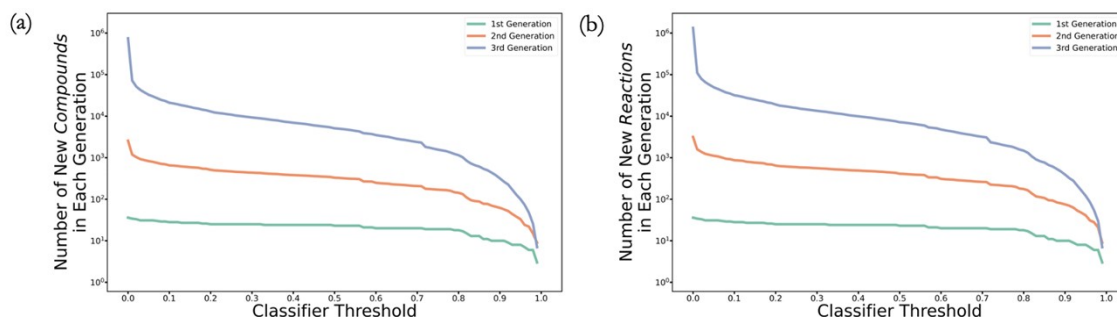

**SI Fig. 15** (a) Number of new reactions and (b) compounds remaining after each generation of a three-step network expansion performed by DORA-XGB starting from pyruvic acid. With DORA-XGB, users can either set custom thresholds or use the ones reported in this work. A higher threshold would lead to the prediction of few higher confidence pathways within short computational runtimes, but this efficiency comes at the cost of filtering out several other potential candidate pathways. Meanwhile, a lower threshold would return a larger space of candidate pathways but with longer runtimes and greater computational expense.

#### 276 4.9 Examining performance drops between test and benchmarking AUPRC of DORA-XGB

277 We realize that there is a considerable performance drop in terms of AUPRC between the  
278 external benchmarking set and the testing set (0.79 vs. 0.92). We highlight that this performance  
279 drop arises because enzymatic transformations that are frequent in the benchmarking set are not  
280 commonly observed in the training, validation, or the testing sets. We encode for enzymatic  
281 transformations in terms of our publicly available reaction rules (or templates). There exist 1224  
282 such unique rules, and they are ordered in terms of the number of known reactions mapped to each  
283 rule, i.e., rule0001 has far more reactions mapped to it (1236 reactions in BRENDA) than rule1224  
284 (only 2 reactions in BRENDA). Consequently, lower-numbered rules represent more common  
285 transformations (e.g., the dehydrogenation of alcohols as encoded in rule0002) than higher-  
286 numbered rules (e.g., the hydrolysis of nitrile-containing substrates encoded in rule0243). When  
287 we consider the proportion of reactions that are cumulatively represented by each rule within the  
288 four total sets (training, validation, testing, and benchmarking), we find that this distribution is  
289 nearly identical for the training, testing, and validation sets but distinct for the benchmarking set.  
290 This is expected since we performed our train/ validation/ test splits iteratively on a rule-by-rule  
291 basis and with stratification such that the distribution of positive (feasible) to negative (infeasible)  
292 reactions is retained for each rule within the training, validation, and testing sets. Meanwhile, the  
293 external benchmarking set represents an out-of-distribution sample so it is again expected that that  
294 the cumulative distribution of reactions mapped to each rule in the benchmarking set would be

295 different than that in the training, validation, and testing sets. More crucially, visualizing the  
296 cumulative distribution reveals that there is actually a skew in the benchmarking set towards higher-  
297 numbered rules. Put differently, reactions that exhibit rarer transformations occur more frequently  
298 in the benchmarking set than in the training set. Given fewer opportunities to learn such rare  
299 transformations during training, our model performance drops when it confronts these  
300 transformations in benchmarking.

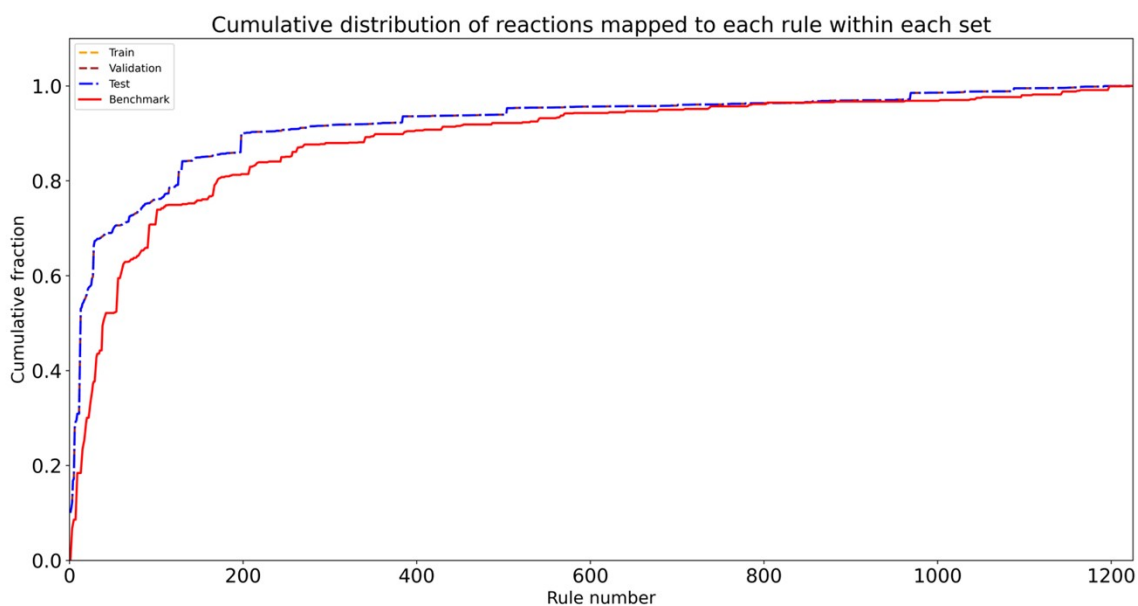

301

302 **SI Fig. 16** Cumulative distribution of reactions mapped to each rule within the training (dashed orange line), validation  
303 (dashed maroon line), testing (dashed blue line), and benchmarking (solid red line) sets.

304            Instead of a cumulative distribution for each set, we can also plot the distribution of the  
305 number of reactions mapped to each rule normalized by the total number of reactions in that set.  
306 This further confirms that the benchmarking set not only comprises a different frequency  
307 distribution of reactions mapped to each rule when compared to the training, validation, and testing  
308 sets but also a skew towards reactions mapped to higher-numbered rules, i.e., rarer transformation  
309 types.

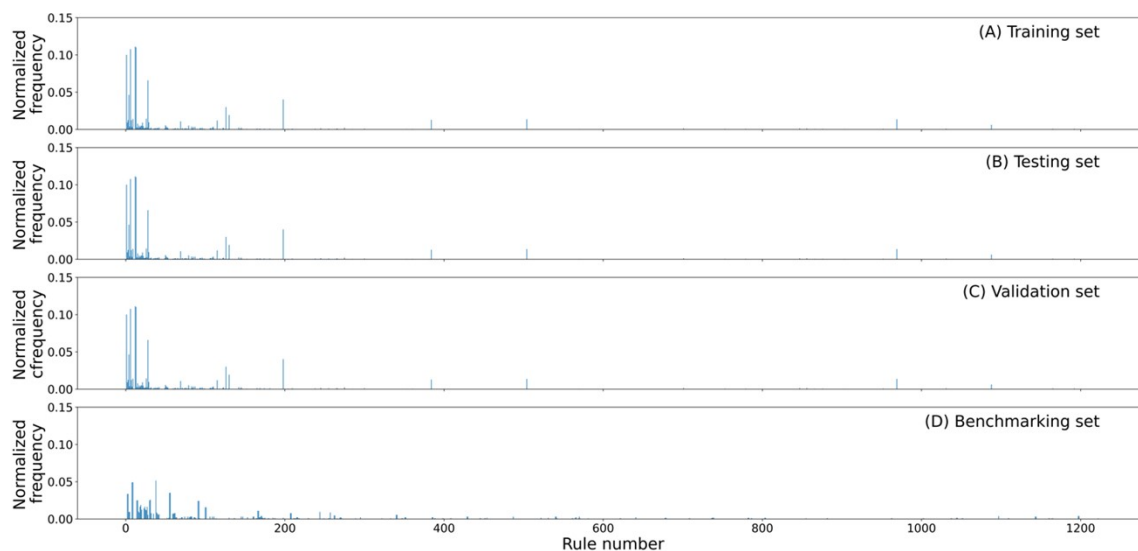

310

311 **SI Fig. 17** Normalized frequency of reactions mapped to each reaction rule in the (a) training, (b) testing, (c) validation,  
312 and (d) benchmarking sets.

313
